# Supplementary material for: Optical properties and photoactivity of carbon nanodots synthesized from olive solid wastes at different carbonization temperatures
Source: Royal Society of Chemistry journal article supplement (doi:10.1039/d1ra09273a), 2022-01-01
Supplement: d1ra09273a1.pdf [file d1ra09273a1.pdf]

Supplementary Information for:

## Optical Properties and Photoactivity of Carbon Nanodots Synthesized from Olive Solid Wastes at Different Carbonization Temperatures.

Shadi Sawalha\*<sup>a</sup>, Mohyeddin Assali<sup>b</sup>, Ameerah Nasasrah<sup>‡a</sup>, Maha Salman<sup>‡a</sup>, Majd Nasasrah<sup>‡a</sup>, Madleen Jitan<sup>‡a</sup>, Hikmat S. Hilal<sup>c</sup>, and Ahed Zyuod<sup>c</sup>

Table S1: The proximate analysis at different carbonization temperatures .

| Carbonation temperature °C | Moisture Content (%) | Volatile Matter (%) | Ash Content (%) | Fixed Carbon (%) |
|----------------------------|----------------------|---------------------|-----------------|------------------|
| Virgin OSW                 | 4.3                  | 73.7                | 2.0             | 20.6             |
| 300                        | 0.9                  | 64.7                | 5.1             | 29.3             |
| 400                        | 2.17                 | 22.8                | 7.4             | 67.63            |
| 500                        | 0.5                  | 16.2                | 9.0             | 73.3             |
| 600                        | 0.5                  | 13.0                | 13.0            | 73.5             |
| 700                        | 0.8                  | 11.9                | 9.6             | 77.7             |
| 800                        | 1.0                  | 7.4                 | 11.7            | 79.9             |
| 900                        | 4.1                  | 6.2                 | 9.4             | 80.3             |

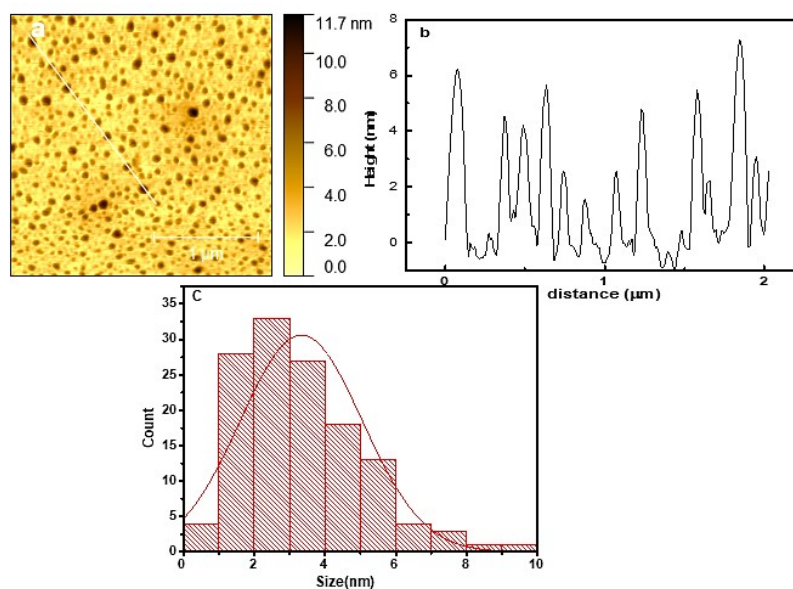

Fig.S1 (a) AEM image, (b) Height profile, (c) distribution hisdtogram of prepared CD400.

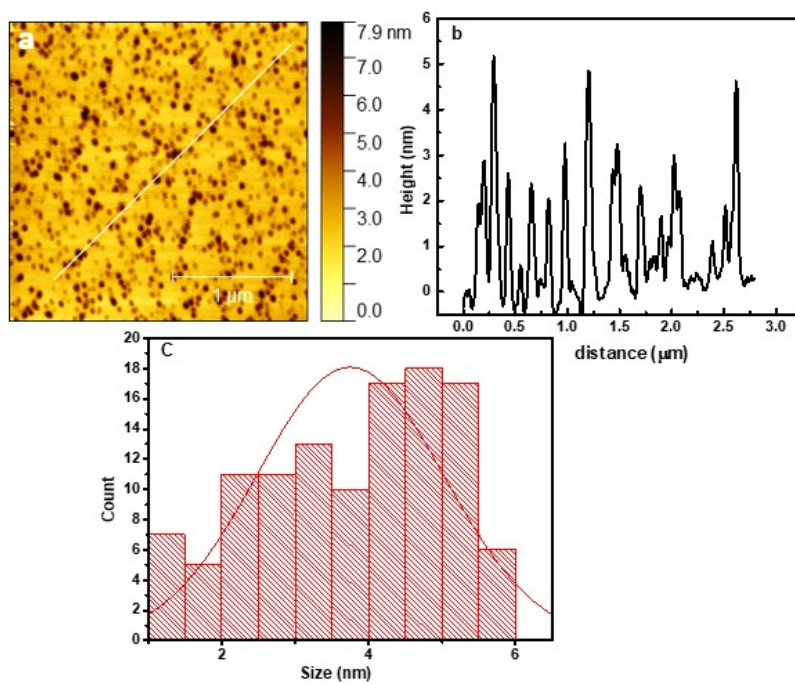

Fig. S2 (a) AEM image, (b) Height profile, (c) distribution histogram of prepared CD500.

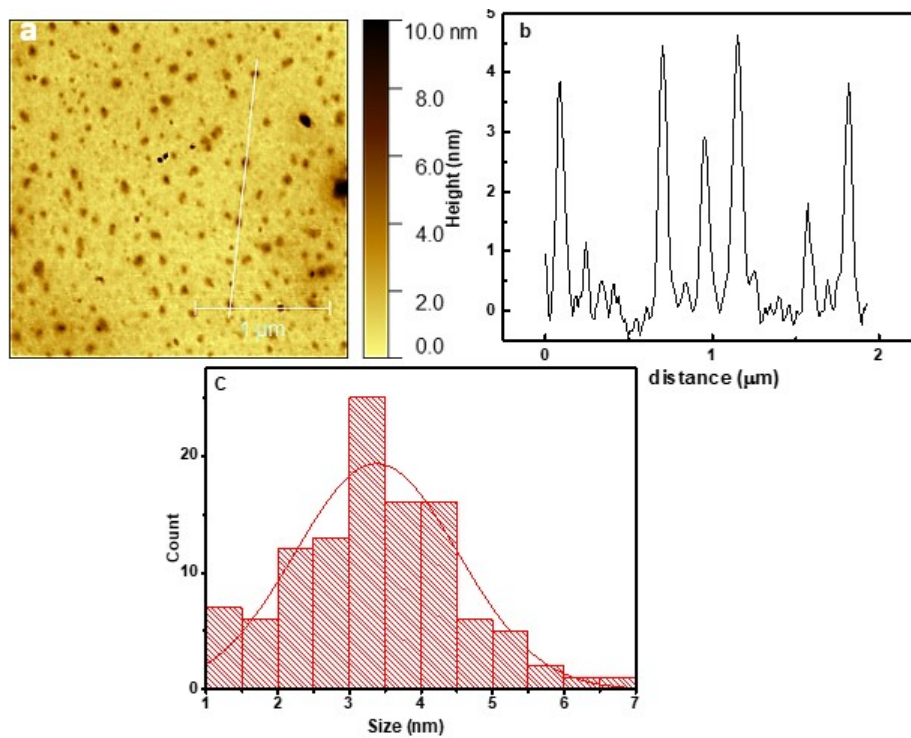

Fig. S3 (a) AEM image, (b) Height profile, (c) distribution histogram of prepared CD600.

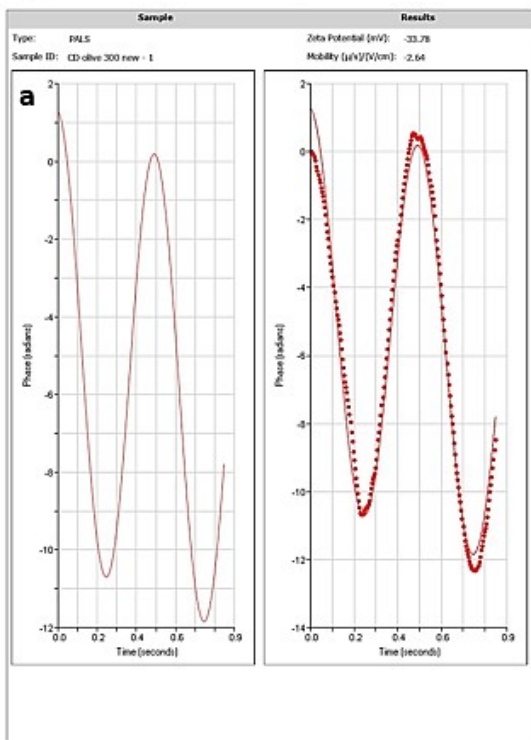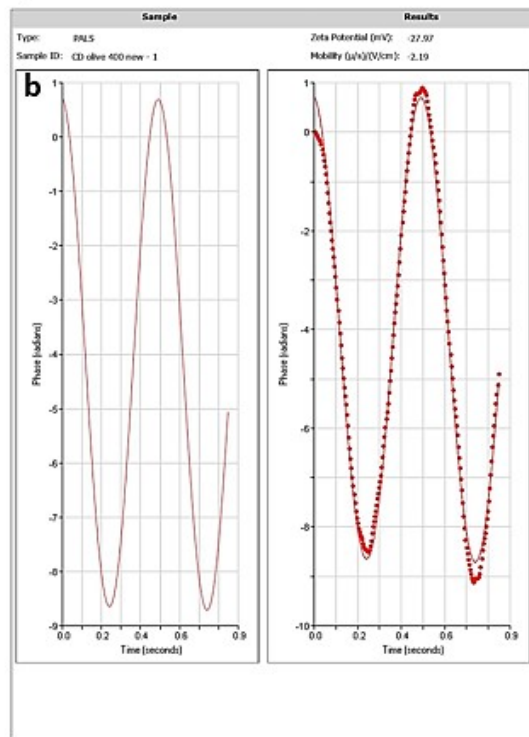

Fig. S4: PALS curves of z-potential of (a) CD300, (b) CD400

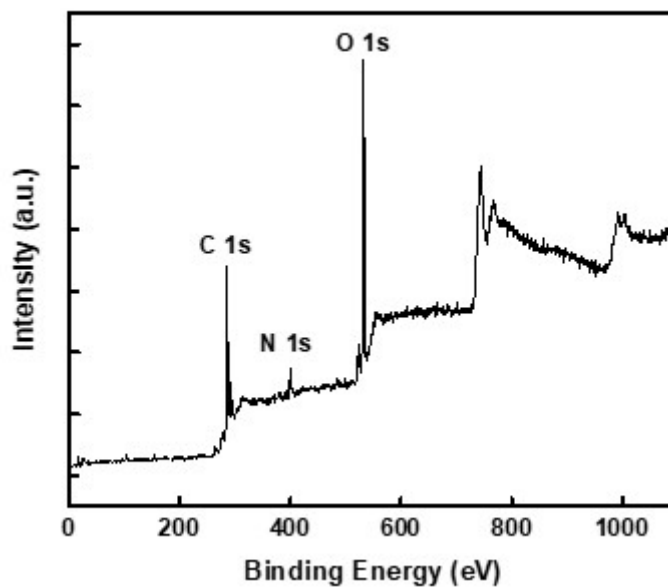

Fig. S5: XPS Spectrum Survey of CD300

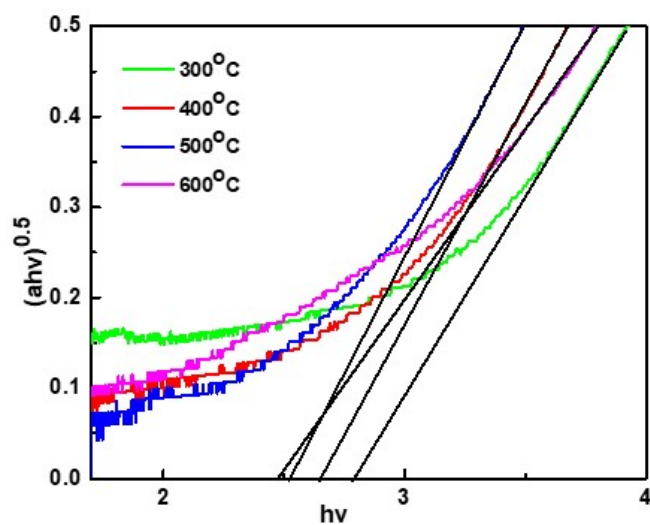

Fig. S6 Tauc plot of CD300, CD400, CD500, and CD600.

Table S2: Calculation of Quantum Yield (QY).

| Temperature     | Integrated Intensity | Absorbance | Intensity/Absorbance | QY%   |
|-----------------|----------------------|------------|----------------------|-------|
| 300             | 11.01                | 0.075      | 146.83               | 5.17  |
| 400             | 10.61                | 0.086      | 123.37               | 4.34  |
| 500             | 9.39                 | 0.087      | 107.98               | 3.80  |
| 600             | 6.33                 | 0.063      | 100.59               | 3.54  |
| 700             | 5.36                 | 0.059      | 90.85                | 3.20  |
| 800             | 3.66                 | 0.053      | 69.06                | 2.43  |
| <b>Standard</b> | 151.45               | 0.097      | 1561.32              | 55.00 |
